# Supplementary material for: Inhibition of Angiotensin-Converting Enzyme Ameliorates Renal Fibrosis by Mitigating DPP-4 Level and Restoring Antifibrotic MicroRNAs
Source: PubMed Central journal article supplement (PMC7074526; doi:10.3390/genes11020211), 2020-02-18
Supplement: genes-11-00211-s001.pdf [file genes-11-00211-s001.pdf]

## Supplementary information

### Inhibition of angiotensin-converting enzyme ameliorates renal fibrosis by mitigating DPP-4 level and restoring antifibrotic microRNAs

Swayam Prakash Srivastava<sup>1,2</sup>, Julie E. Goodwin<sup>2</sup>, Keizo Kanasaki<sup>1,3,4</sup>, Daisuke Koya<sup>1,3</sup>

<sup>1</sup>Department of Diabetology & Endocrinology, Kanazawa Medical University, Uchinada, Ishikawa, Japan 920-0293

<sup>2</sup>Department of Pediatrics Yale University School of Medicine, New Haven, CT, 06520, USA

<sup>3</sup>Division of Anticipatory Molecular Food Science and Technology, Kanazawa Medical University, Uchinada, Ishikawa, Japan 920-0293

<sup>4</sup>Shimane University Faculty of Medicine, Internal Medicine 1, Enya-cho, Izumo, Shimane 693-8501, Japan

#### \*: Co-correspondence

Address correspondence to:

Keizo Kanasaki,

E-mail: [kkanasak@kanazawa-med.ac.jp](mailto:kkanasak@kanazawa-med.ac.jp),

Or

Daisuke Koya

E-mail: [koya0516@kanazawa-med.ac.jp](mailto:koya0516@kanazawa-med.ac.jp),

Department of Diabetology & Endocrinology

Kanazawa Medical University

Uchinada, Ishikawa 920-0293, Japan

TEL: 81-76-286-2211(Ex3305)

FAX: 81-76-286-6927

**Figure S1:** Gene expression analysis of ACE in kidneys of ACE inhibitor treated diabetic mice and gene expression analysis of AT1R in kidneys of ARB treated diabetic mice

Real time PCR analysis using specific primers. Five number of mice were analyzed in each group. 18S was used to normalize the expression data. Data in the graph are presented as mean±SEM. One way Anova Tukey test was performed for calculation of statistical significance.

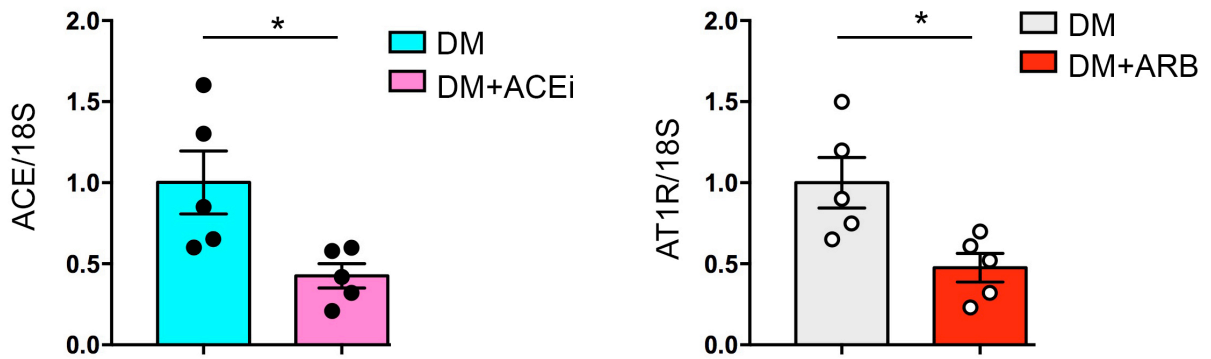

**Supplementary Fig 2A.** Measurement of urine AcSDKP in the control, DM and linagliptin treated diabetic mice. N=4 were analyzed. Data in the graph are presented as mean±SEM

**Supplementary Fig. 2B.** ACE activity in the kidneys of control and diabetic, and linagliptin treated diabetic mice. N=4 were analyzed. Data in the graph are presented as mean±SEM. One way Anova Tukey test was performed for calculation of statistical significance.

**A.**

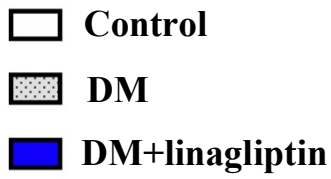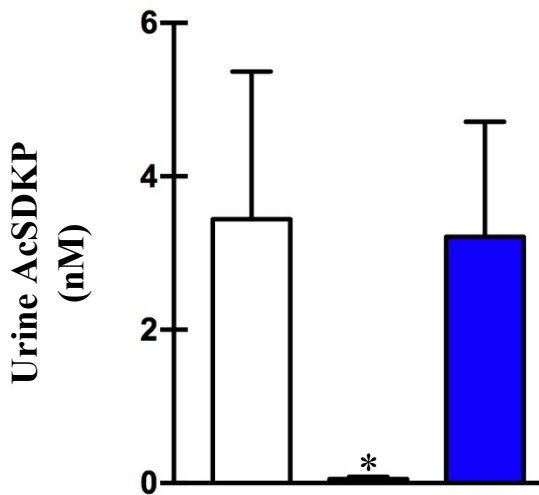

**B.**

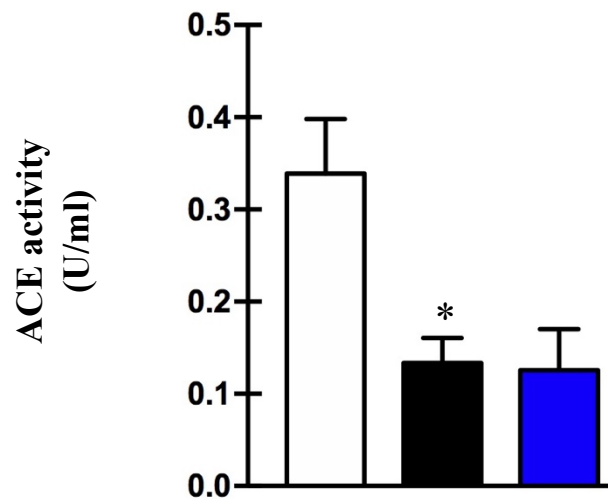

**Figure S3** Altered microRNAs were analyzed using online programs (TargetScan, PicTar and miRanda) for target identification.

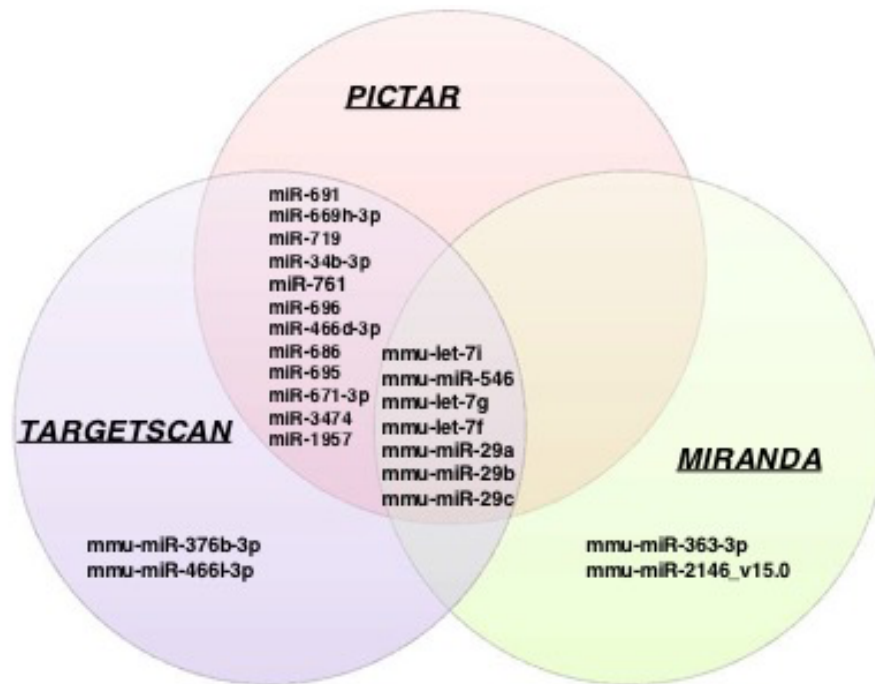

Table S1. Determination of biological processes and relevant pathways from predicted targets of miR-29 family members.

Table S1A: Biological processes significantly ( $p < 0.001$ ) enriched in the predicted targets of miR-29 family members

| S.N. | Biological process                                             | Number of genes from our predicted target list |
|------|----------------------------------------------------------------|------------------------------------------------|
| 1    | cellular process                                               | 513                                            |
| 2    | developmental process                                          | 286                                            |
| 3    | regulation of liquid surface tension                           | 29                                             |
| 4    | biological regulation                                          | 302                                            |
| 5    | cell communication                                             | 310                                            |
| 6    | transcription, DNA-dependent                                   | 197                                            |
| 7    | transcription from RNA polymerase II promoter                  | 195                                            |
| 8    | anatomical structure morphogenesis                             | 94                                             |
| 9    | RNA metabolic process                                          | 230                                            |
| 10   | cellular component morphogenesis                               | 87                                             |
| 11   | regulation of transcription from RNA polymerase II promoter    | 155                                            |
| 12   | regulation of biological process                               | 203                                            |
| 13   | homeostatic process                                            | 35                                             |
| 14   | regulation of nucleobase-containing compound metabolic process | 161                                            |
| 15   | cell-cell adhesion                                             | 70                                             |
| 16   | cellular component organization                                | 117                                            |
| 17   | cell adhesion                                                  | 101                                            |
| 18   | biological adhesion                                            | 101                                            |
| 19   | ectoderm development                                           | 101                                            |
| 20   | nucleobase-containing compound metabolic process               | 282                                            |
| 21   | cellular component organization or biogenesis                  | 118                                            |
| 22   | receptor-mediated endocytosis                                  | 40                                             |
| 23   | endocytosis                                                    | 59                                             |
| 24   | vesicle-mediated transport                                     | 100                                            |
| 25   | metabolic process                                              | 596                                            |
| 26   | protein transport                                              | 128                                            |
| 27   | primary metabolic process                                      | 511                                            |
| 28   | blood circulation                                              | 30                                             |
| 29   | macrophage activation                                          | 44                                             |
| 30   | response to pheromone                                          | 0                                              |

|    |                                          |     |
|----|------------------------------------------|-----|
| 31 | intracellular protein transport          | 123 |
| 32 | mesoderm development                     | 103 |
| 33 | system development                       | 141 |
| 34 | multicellular organismal process         | 168 |
| 35 | single-multicellular organism process    | 168 |
| 36 | localization                             | 212 |
| 37 | gamete generation                        | 57  |
| 38 | transport                                | 203 |
| 39 | cell-matrix adhesion                     | 20  |
| 40 | system process                           | 139 |
| 41 | protein phosphorylation                  | 58  |
| 42 | spermatogenesis                          | 30  |
| 43 | cell cycle                               | 120 |
| 44 | reproduction                             | 62  |
| 45 | cell-cell signaling                      | 74  |
| 46 | cellular protein modification process    | 101 |
| 47 | synaptic transmission                    | 42  |
| 48 | negative regulation of apoptotic process | 24  |
| 49 | nervous system development               | 80  |

**Table S1B: Relevant Biological pathway significantly from the predicted targets of miR-29 family members**

| S.N. | Biological pathway                  |
|------|-------------------------------------|
| 1    | TGF-beta signaling pathway          |
| 2    | FGF signaling pathway               |
| 3    | Hypoxia response via HIF activation |
| 4    | Integrin signalling pathway         |
| 5    | DPP-4 pathway                       |

|    |                                                        |
|----|--------------------------------------------------------|
| 6  | Ras Pathway                                            |
| 7  | Apoptosis signaling pathway                            |
| 8  | PI3 kinase pathway                                     |
| 9  | PDGF signaling pathway                                 |
| 10 | T cell activation                                      |
| 11 | Angiogenesis                                           |
| 12 | p53 pathway feedback loops 2                           |
| 13 | B cell activation                                      |
| 14 | Insulin/IGF pathway-protein kinase B signaling cascade |
| 15 | Ras Pathway                                            |
| 16 | Apoptosis signaling pathway                            |
| 17 | PI3 kinase pathway                                     |
| 18 | PDGF signaling pathway                                 |
| 19 | T cell activation                                      |
| 20 | Angiogenesis                                           |
| 21 | p53 pathway feedback loops 2                           |

Table S2. Determination of biological processes and relevant pathways from predicted targets of miR-let-7 family members. A: Biological processes significantly ( $p < 0.001$ ) enriched in the predicted targets of miR-let-7 family members

| S.N. | Biological process                                          | Number of genes from our predicted target list |
|------|-------------------------------------------------------------|------------------------------------------------|
| 1    | metabolic process                                           | 394.48                                         |
| 2    | primary metabolic process                                   | 330.91                                         |
| 3    | biological regulation                                       | 144.79                                         |
| 4    | developmental process                                       | 127.85                                         |
| 5    | cellular process                                            | 281.56                                         |
| 6    | cellular protein modification process                       | 55.1                                           |
| 7    | protein metabolic process                                   | 134.41                                         |
| 8    | cell communication                                          | 152.42                                         |
| 9    | transcription, DNA-dependent                                | 87.06                                          |
| 10   | transcription from RNA polymerase II promoter               | 86.57                                          |
| 11   | localization                                                | 123.93                                         |
| 12   | regulation of biological process                            | 96.96                                          |
| 13   | regulation of nucleobase-containing metabolic process       | 71.19                                          |
| 14   | protein transport                                           | 58.89                                          |
| 15   | intracellular protein transport                             | 58.22                                          |
| 16   | protein phosphorylation                                     | 25.14                                          |
| 17   | RNA metabolic process                                       | 109.35                                         |
| 18   | regulation of transcription from RNA polymerase II promoter | 66.78                                          |
| 19   | transport                                                   | 120.94                                         |
| 20   | regulation of liquid surface tension                        | 2.01                                           |
| 21   | nucleobase-containing compound metabolic process            | 156.16                                         |
| 22   | response to pheromone                                       | 14.62                                          |
| 23   | anatomical structure morphogenesis                          | 30                                             |
| 24   | homeostatic process                                         | 6.11                                           |
| 25   | cellular component organization                             | 46.54                                          |
| 26   | receptor-mediated endocytosis                               | 9.45                                           |
| 27   | system development                                          | 73.29                                          |
| 28   | cellular component organization or biogenesis               | 50.02                                          |
| 29   | mesoderm development                                        | 46.23                                          |
| 30   | cellular component morphogenesis                            | 28                                             |
| 31   | vesicle-mediated transport                                  | 41.64                                          |
| 32   | cell adhesion                                               | 38.61                                          |
| 33   | biological adhesion                                         | 38.61                                          |
| 34   | phosphate-containing compound metabolic process             | 23.31                                          |
| 35   | cation transport                                            | 27.06                                          |
| 36   | cell cycle                                                  | 65.67                                          |



|    |                    |      |
|----|--------------------|------|
| 37 | cell-cell adhesion | 21.4 |
|----|--------------------|------|

Table S2B: Relevant Biological pathway significantly from the predicted targets of the miR-let-7s

| S.N. | Biological pathway                                     |
|------|--------------------------------------------------------|
| 1    | Gonadotropin releasing hormone receptor pathway        |
| 2    | PDGF signaling pathway                                 |
| 3    | Integrin signalling pathway                            |
| 4    | Insulin/IGF pathway-protein kinase B signaling cascade |
| 5    | Apoptosis signaling pathway                            |
| 6    | p53 pathway by glucose deprivation                     |
| 7    | B cell activation                                      |
| 8    | p53 pathway                                            |
| 9    | T cell activation                                      |
| 10   | TGF-beta signaling pathway                             |
| 11   | Alzheimer disease-amyloid secretase pathway            |
| 12   | Alpha adrenergic receptor signaling pathway            |
| 13   | Adrenaline and noradrenaline biosynthesis              |
| 14   | Nicotine pharmacodynamics pathway                      |
| 15   | Toll_pathway_drosophila                                |
| 16   | SCW_signaling_pathway                                  |
| 17   | MYO_signaling_pathway                                  |
| 18   | GBB_signaling_pathway                                  |
| 19   | DPP_signaling_pathway                                  |

**Figure S4: Gene expression level of miR-let-7f, miR-let-7g and miR-let-7i in the kidneys of control, diabetic and ARB treated diabetic mice**

Real time PCR analysis using specific primers in the kidney of control, DM, ARB treated diabetic group. N=6 were analyzed in each group. Hs\_RNU6 was used as internal control to normalize the expression data. Data in the graph are presented as mean±SEM. One way Anova Tukey test was performed for calculation of statistical significance.

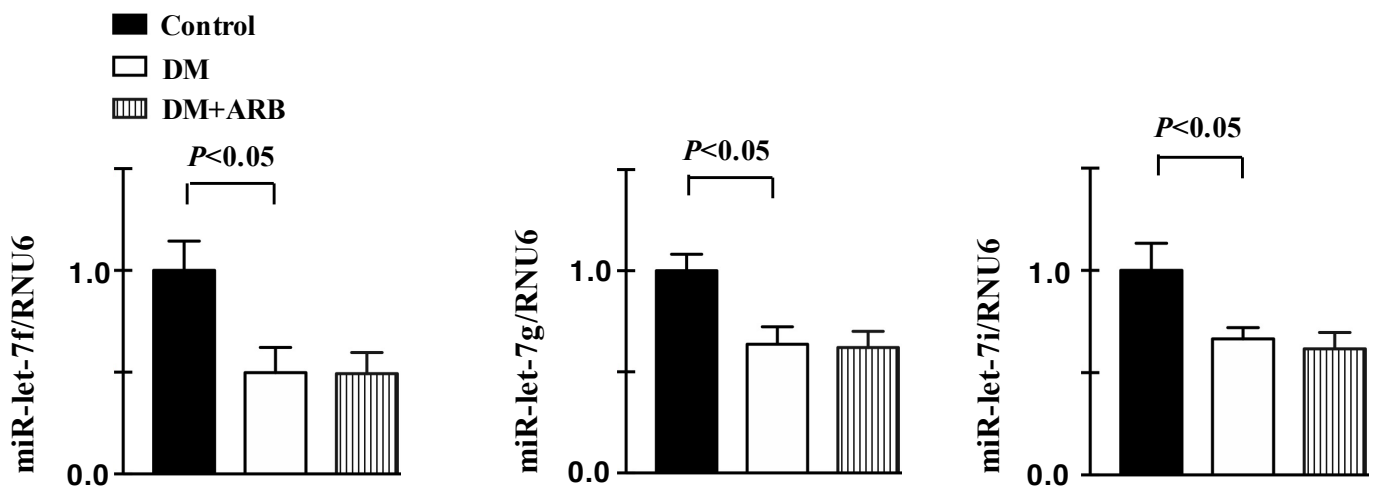

**Figure S5: Gene expression level of  $\alpha$ SMA and fibronectin in the Ang II stimulated high glucose treated HMVECs**

Real time PCR analysis using specific primers in the Ang II (10  $\mu$ M) stimulated cultured HMVECs. Experiment in triplicate were analyzed. 18S was used to normalize the expression data. Data in the graph are presented as mean $\pm$ SEM. One way Anova Tukey test was performed for calculation of statistical significance.

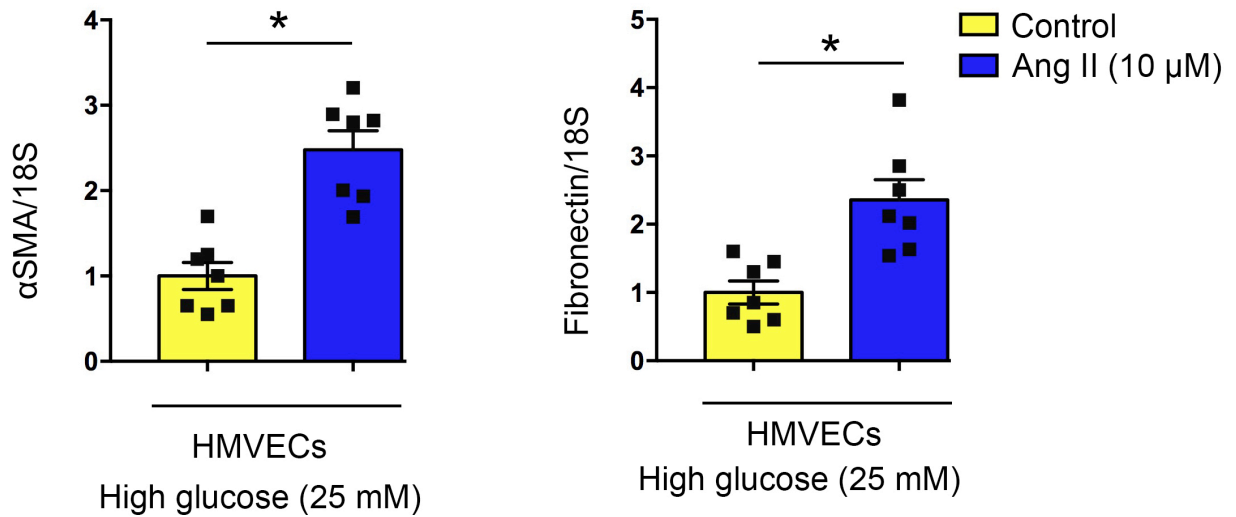

**Figure S6: Gene expression analysis of DPP-4 and antifibrotic microRNAs in the POP inhibitor treated TGFβ2 stimulated HMVECs**

Real time PCR analysis using specific primers in the POP inhibitor (A17092 (5 μM) treated TGFβ2-stimulated HMVECs. Experiment in triplicate were analyzed. 18S was used to normalize the DPP-4 whereas, HS\_RNU6 was used to normalize mir-29 and miR-let-7 expression data. Data in the graph are presented as mean±SEM. N=4 were analyzed in each group. One way Anova Tukey test was performed for calculation of statistical significance.

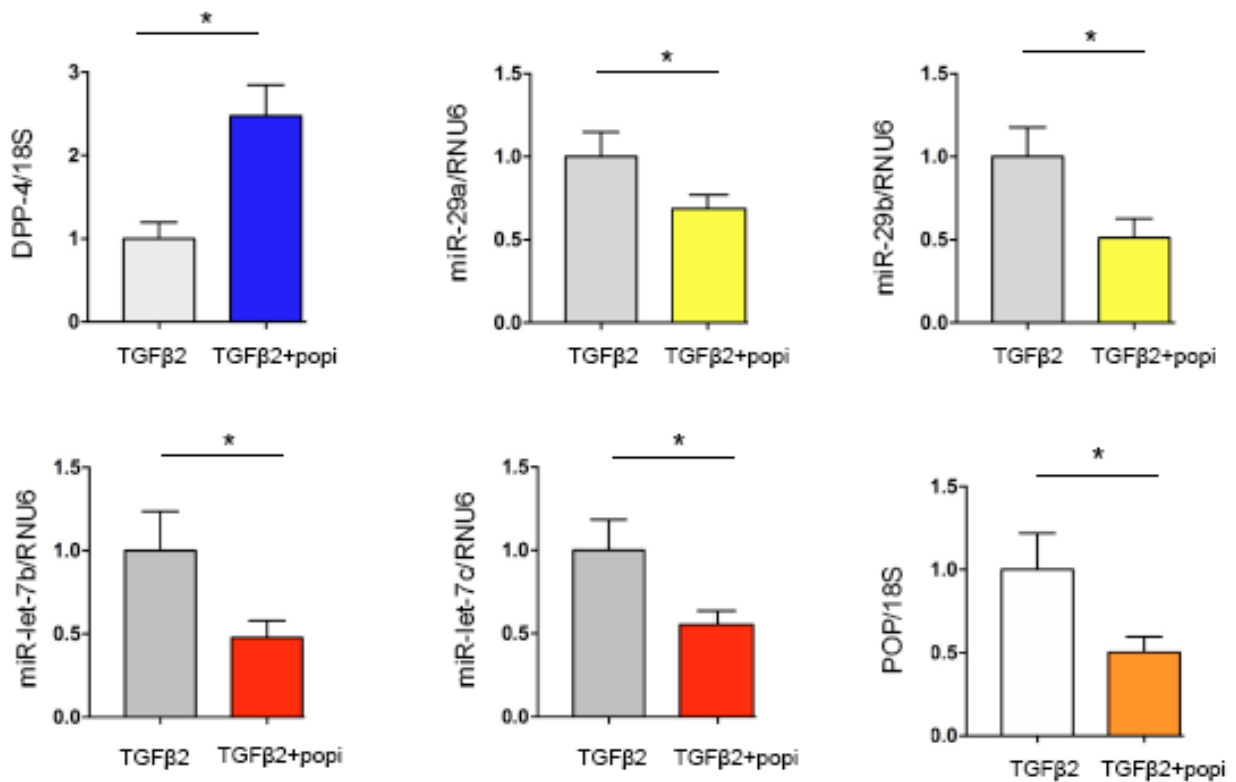

Figure S6
